# Supplementary material for: Ex Vivo Analysis of Human Memory B Lymphocytes Specific for A and B Influenza Hemagglutinin by Polychromatic Flow-Cytometry
Source: PLoS One. 2013 Aug 15;8(8):e70620. doi: 10.1371/journal.pone.0070620 (PMC3744578; doi:10.1371/journal.pone.0070620)
Supplement: Table S1 — VHVL rearrangements, mutation frequency and length of the CDR3 regions in individual HA+ B cell clones analyzed in figure 5 . (XLSX) [file pone.0070620.s002.xlsx]

## Sheet: all clones
Table S1
Subject	Clone #	Binding	V name	J name	D name	Total nt mutation in V region	Total aa changes in V region	CDR3 lenght (aa)
#1	5	H3	IGHV3-66*04	IGHJ6*02	IGHD1-1*01	10	8	10
#1	5	H3	IGLV8-61*01	IGLJ3*02		3	1	10
#1	17	H3	IGHV3-7*01	IGHJ5*02	IGHD6-19*01	15	8	17
#1	17	H3	IGKV4-1*01	IGKJ4*01		10	7	9
#1	19	H3	IGHV4-59*01	IGHJ4*02	IGHD5-5*01	3	2	14
#1	19	H3	IGKV4-1*01	IGKJ3*01		5	2	9
#1	22	H3	IGHV3-23*04	IGHJ6*01	IGHD6-19*01	6	4	24
#1	22	H3	IGLV3-21*01	IGLJ3*01		6	4	12
#1	24	H3	IGHV3-74*02	IGHJ4*02	IGHD3-22*01	1	0	15
#1	24	H3	IGKV3-11*01	IGKJ3*01		2	1	9
#1	51	H1	IGHV3-53*01	IGHJ6*02	IGHD3-9*01	0	0	15
#1	51	H1	IGKV1D-39*01	IGKJ1*01		0	0	9
#1	54	H1	IGHV3-23*04	IGHJ4*02	IGHD3-22*01	24	15	12
#1	54	H1	IGKV3-20*01	IGKJ1*01		9	7	9
#1	55	H1	IGHV3-33*01	IGHJ4*02	IGHD1-14*01	10	7	10
#1	55	H1	IGLV4-69*01	IGLJ3*02		1	1	9
#1	62	H1	IGHV4-31*03	IGHJ6*02	IGHD4-4*01	0	0	17
#1	62	H1	IGLV1-40*02	IGLJ1*01		0	0	11
#1	63	H1	IGHV1-18*01	IGHJ4*01	IGHD6-19*01	24	16	16
#1	63	H1	IGKV3-15*01	IGKJ4*01		9	5	9
#1	64	H1	IGHV4-59*01	IGHJ6*02	IGHD6-6*01	17	11	20
#1	64	H1	IGKV1D-39*01	IGKJ2*01		13	9	9
#1	68	H1	IGHV3-23*05	IGHJ5*02	IGHD3-9*01	22	16	11
#1	68	H1	IGKV3-11*01	IGKJ1*01		5	3	9
#1	69	H1	IGHV3-30*03	IGHJ4*02	IGHD1-26*01	0	0	14
#1	69	H1	IGLV3-9*01	IGLJ3*02		0	0	9
#1	11	H1H3	IGHV4-59*08	IGHJ6*02	IGHD1-20*01	3	2	9
#1	11	H1H3	IGKV3-20*01	IGKJ4*01		2	1	9
#1	44	H1H3	IGHV3-23*04	IGHJ6*02	IGHD1-1*01	1	1	18
#1	44	H1H3	IGKV2D-28*01	IGKJ1*01		0	0	9
#1	46	H1H3	IGHV3-23*05	IGHJ5*02	IGHD3-22*01	19	12	17
#1	46	H1H3	IGKV3-20*01	IGKJ2*01		5	4	11
#2	5	H1+	IGHV4-34*02	IGHJ6*03	IGHD2-8*01	12	8	24
#2	5	H1+	IGKV3-20*01	IGKJ1*01		5	2	9
#2	9	H1+	IGHV4-31*03	IGHJ5*02	IGHD3-10*02	35	21	10
#2	9	H1+	IGKV3-20*01	IGKJ2*01		12	6	10
#2	14	H1+	IGHV5-51*01	IGHJ5*02	IGHD3-10*02	17	10	16
#2	14	H1+	IGKV1D-39*01	IGKJ4*01		17	11	9
#2	16	H1+	IGHV4-34*02	IGHJ6*03	IGHD4-4*01	2	2	17
#2	16	H1+	IGKV1D-39*01	IGKJ1*01		1	1	9
#2	23	H1+	IGHV4-34*02	IGHJ6*03	IGHD6-6*01	0	0	20
#2	23	H1+	IGKV1D-39*01	IGKJ1*01		3	1	9
#2	26	H1+	IGHV4-34*02	IGHJ6*03	IGHD5-24*01	2	0	14
#2	26	H1+	IGKV1D-39*01	IGKJ1*01		2	2	9
#2	33	H1+	IGHV4-34*02	IGHJ3*02	IGHD3-10*01	2	1	22
#2	33	H1+	IGKV4-1*01	IGKJ2*02		6	5	9
#2	36	H1+	IGHV4-34*02	IGHJ6*02	IGHD2-2*03	5	2	23
#2	36	H1+	IGLV1-47*01	IGLJ1*01		2	2	13
#2	38	H1+	IGHV4-34*02	IGHJ6*02	IGHD3-3*01	0	0	21
#2	38	H1+	IGKV3-20*01	IGKJ4*01		0	0	9
#2	53	H1+	IGHV4-34*12	IGHJ4*02	IGHD3-22*01	28	18	12
#2	53	H1+	IGKV3-15*01	IGKJ1*01		13	8	9
#2	56	H1+	IGHV3-23*05	IGHJ5*02	IGHD3-22*01	19	12	17
#2	56	H1+	IGKV3-15*01	IGKJ2*02		5	4	9
#2	68	H1+	IGHV3-72*01	IGHJ6*03	IGHD3-16*02	16	12	18
#2	68	H1+	IGKV4-1*01	IGKJ1*01		12	3	9
#2	78	H1+	IGHV4-61*02	IGHJ4*02	IGHD5-12*01	5	1	14
#2	78	H1+	IGKV1D-33*01	IGKJ3*01		0	0	9
#2	84	H1+	IGHV3-15*07	IGHJ4*02	IGHD2-2*03	4	2	12
#2	84	H1+	IGKV4-1*01	IGKJ1*01		1	1	10
#2	87	H1+	IGHV4-34*12	IGHJ4*02	IGHD3-22*01	24	15	12
#2	87	H1+	IGKV3-15*01	IGKJ1*01		10	9	9
#2	92	H1+	IGHV3-74*01	IGHJ5*02	IGHD3-16*02	5	2	10
#2	92	H1+	IGKV4-1*01	IGKJ5*01		1	0	9
#2	93	H1+	IGHV4-34*13	IGHJ6*03	IGHD4-4*01	10	6	15
#2	93	H1+	IGKV3-15*01	IGKJ2*01		10	6	11
#2	57	H3+	IGHV3-30*19	IGHJ4*02	IGHD4-17*01	22	15	15
#2	57	H3+	IGKV3-20*01	IGKJ1*01		17	10	9
#3	2	H1+	IGHV3-21*01	IGHJ3*02	IGHD6-6*01	1	1	11
#3	2	H1+	IGLV1-47*02	IGLJ3*02		0	0	11
#3	6	H1+	IGHV3-33*01	IGHJ4*02	IGHD2-21*01	8	5	12
#3	6	H1+	IGKV3-15*01	IGKJ1*01		0	0	9
#3	10	H1+	IGHV3-33*01	IGHJ3*01	IGHD2-21*01	26	16	14
#3	10	H1+	IGKV1-27*01	IGKJ1*01		0	0	9
#3	11	H1+	IGHV3-30*03	IGHJ6*02	IGHD1-1*01	1	1	18
#3	11	H1+	IGKV1-39*01	IGKJ1*01		0	0	9
#3	13	H1+	IGHV5-51*01	IGHJ3*02	IGHD6-13*01	0	0	10
#3	13	H1+	IGLV3-1*01	IGLJ2*01		0	0	8
#3	14	H1+	IGHV3-33*01	IGHJ4*02	IGHD5-18*01	1	1	14
#3	14	H1+	IGKV1-39*01	IGKJ4*01		26	9	9
#3	17	H1+	IGHV5-51*01	IGHJ1*01	IGHD3-22*01	2	2	13
#3	17	H1+	IGLV1-51*01	IGLJ3*02		0	0	11
#3	18	H1+	IGHV3-23*01	IGHJ4*02	IGHD6-13*01	1	0	13
#3	18	H1+	IGLV3-21*02	IGLJ3*02		1	1	11
#3	19	H1+	IGHV1-3*01	IGHJ4*01	IGHD6-6*01	17	10	13
#3	19	H1+	IGLV1-47*01	IGLJ1*01		0	0	12
#3	21	H1+	IGHV3-23*01	IGHJ3*02	IGHD2-8*01	23	15	12
#3	21	H1+	IGLV2-23*02	IGLJ2*01		8	3	11
#3	22	H1+	IGHV4-34*01	IGHJ2*01	IGHD3-9*01	0	0	17
#3	22	H1+	IGKV3-20*01	IGKJ1*01		0	0	9
#3	30	H1+	IGHV1-18*01	IGHJ6*02	IGHD6-6*01	0	0	18
#3	30	H1+	IGKV2-28*01	IGKJ3*01		0	0	10
#3	31	H1+	IGHV3-33*01	IGHJ6*03	IGHD1-1*01	22	10	16
#3	31	H1+	IGLV2-11*01	IGLJ1*01		11	7	9
#3	32	H1+	IGHV4-4*07	IGHJ4*02	IGHD3-22*01	0	0	17
#3	32	H1+	IGKV1-39*01	IGKJ4*01		0	0	10
#3	33	H1+	IGHV1-46*01	IGHJ4*02	IGHD5-12*01	0	0	7
#3	33	H1+	IGKV1-39*01	IGKJ1*01		0	0	9
#3	34	H1+	IGHV3-23*01	IGHJ3*02	IGHD4-23*01	0	0	13
#3	34	H1+	IGKV3-20*01	IGKJ4*01		0	0	8
#3	41	H1+	IGHV1-2*02	IGHJ4*02	IGHD1-26*01	18	8	15
#3	41	H1+	IGKV1-39*01	IGKJ4*01		8	5	9
#3	44	H1+	IGHV1-69*04	IGHJ4*02	IGHD3-10*01	0	0	10
#3	44	H1+	IGKV3-11*01	IGKJ2*01		0	0	9
#3	45	H1+	IGHV1-2*04	IGHJ6*02	IGHD6-6*01	0	0	16
#3	45	H1+	IGKV1-39*01	IGKJ4*01		0	2	9
#3	46	H1+	IGHV3-23*01	IGHJ6*02	IGHD2-2*01	0	0	18
#3	46	H1+	IGKV1-9*01	IGKJ3*01		0	0	9
#3	48	H1+	IGHV1-2*02	IGHJ4*02	IGHD3-22*01	5	2	20
#3	48	H1+	IGLV2-8*01	IGLJ1*01		7	3	10
#3	50	H1+	IGHV1-2*02	IGHJ6*03	IGHD2-8*02	20	27	20
#3	50	H1+	IGLV2-14*01	IGLJ1*01		1	0	10
#3	61	H1+	IGHV3-74*01	IGHJ6*02	IGHD6-19*01	0	0	26
#3	61	H1+	IGKV1-39*01	IGKJ4*01		0	0	9
#3	62	H1+	IGHV4-39*01	IGHJ4*02	IGHD4-17*01	1	1	9
#3	62	H1+	IGLV1-47*01	IGLJ3*02		0	0	11
#3	66	H1+	IGHV3-74*01	IGHJ5*02	IGHD1-20*01	0	0	15
#3	66	H1+	IGKV1-39*01	IGKJ4*01		9	3	9
#3	68	H1+	IGHV3-30*04	IGHJ5*02	IGHD3-22*01	22	13	10
#3	68	H1+	IGLV3-1*01	IGLJ2*01		0	0	9
#3	69	H1+	IGHV3-23*01	IGHJ4*02	IGHD5-18*01	1	1	12
#3	69	H1+	IGKV2-28*01	IGKJ1*01		2	1	10
#3	70	H1+	IGHV1-18*01	IGHJ4*02	IGHD3-10*01	0	0	17
#3	70	H1+	IGKV3-11*01	IGKJ4*01		3	2	10
#3	76	H1+	IGHV3-15*01	IGHJ3*02	IGHD6-13*01	0	0	5
#3	76	H1+	IGKV4-1*01	IGKJ1*01		6	3	8
#3	79	H1+	IGHV4-39*01	IGHJ4*02	IGHD4-17*01	0	0	14
#3	79	H1+	IGKV3-15*01	IGKJ4*01		0	0	9
#3	80	H1+	IGHV4-4*07	IGHJ4*02	IGHD3-16*01	21	13	15
#3	80	H1+	IGKV4-1*01	IGKJ1*01		9	6	9
#3	85	H1+	IGHV3-23*01	IGHJ4*02	IGHD5-18*01	0	0	11
#3	85	H1+	IGLV2-14*01	IGLJ2*01		0	0	11
#3	88	H1+	IGHV1-69*04	IGHJ4*02	IGHD5-24*01	2	1	16
#3	88	H1+	IGLV7-43*01	IGLJ3*02		3	1	9
#3	90	H1+	IGHV4-39*01	IGHJ5*02	IGHD6-19*01	1	1	15
#3	90	H1+	IGLV1-51*01	IGLJ3*02		1	1	11
#3	95	H1+	IGHV3-15*01	IGHJ4*02	IGHD4-11*01	19	16	9
#3	95	H1+	IGKV2-30*01	IGKJ1*01		5	3	9
#3	2	HA-	IGHV5-51*01	IGHJ4*02	IGHD1-26*01	4	2	13
#3	2	HA-	IGKV1-39*01	IGKJ4*01		2	0	9
#3	6	HA-	IGHV4-34*01	IGHJ4*02	IGHD4-23*01	0	0	14
#3	6	HA-	IGKV2-30*01	IGKJ2*01		1	0	11
#3	13	HA-	IGHV3-73*01	IGHJ4*02	IGHD2-15*01	2	1	17
#3	13	HA-	IGKV3-15*01	IGKJ3*01		11	6	10
#3	23	HA-	IGHV3-23*01	IGHJ4*02	IGHD3-16*02	21	13	15
#3	23	HA-	IGKV1D-8*01	IGKJ2*01		7	3	9
#3	29	HA-	IGHV3-9*01	IGHJ4*02	IGHD4-17*01	10	8	14
#3	29	HA-	IGKV3-15*01	IGKJ5*01		5	2	8
#3	34	HA-	IGHV3-21*01	IGHJ4*02	IGHD2-15*01	0	0	10
#3	34	HA-	IGKV3-15*01	IGKJ2*01		0	0	10
#3	39	HA-	IGHV3-30-3*01	IGHJ6*02	IGHD2-21*01	0	0	14
#3	39	HA-	IGKV1-5*01	IGKJ2*01		8	6	6
#3	58	HA-	IGHV1-18*01	IGHJ4*02	IGHD5-18*01	3	2	10
#3	58	HA-	IGKV1-27*01	IGKJ4*01		0	0	9
#3	60	HA-	IGHV3-7*03	IGHJ4*02	IGHD2-2*01	2	2	19
#3	60	HA-	IGKV3-11*01	IGKJ5*01		0	0	11
#3	62	HA-	IGHV4-34*01	IGHJ5*02	IGHD2-2*01	0	0	21
#3	62	HA-	IGKV4-1*01	IGKJ4*01		0	0	9
#3	66	HA-	IGHV4-31*02	IGHJ6*02	IGHD3-22*01	4	2	18
#3	66	HA-	IGKV3-20*01	IGKJ2*01		1	0	9
#3	69	HA-	IGHV3-23*01	IGHJ4*02	IGHD6-13*01	25	11	14
#3	69	HA-	IGKV3-15*01	IGKJ4*01		9	2	9
#3	74	HA-	IGHV3-49*03	IGHJ6*02	IGHD3-10*01	2	1	22
#3	74	HA-	IGKV3-11*01	IGKJ5*01		0	0	10
#3	85	HA-	IGHV3-11*01	IGHJ2*01	IGHD4-17*01	13	9	11
#3	85	HA-	IGKV1-5*03	IGKJ1*01		15	6	9
#3	86	HA-	IGHV4-31*02	IGHJ4*02	IGHD3-9*01	10	4	22
#3	86	HA-	IGKV3-11*01	IGKJ4*01		0	0	9
#3	88	HA-	IGHV1-69*04	IGHJ4*02	IGHD6-6*01	0	0	11
#3	88	HA-	IGKV1-17*01	IGKJ1*01		0	0	9
#3	91	HA-	IGHV3-7*01	IGHJ4*02	IGHD3-22*01	6	4	22
#3	91	HA-	IGKV1-17*01	IGKJ1*01		6	5	9
#3	92	HA-	IGHV4-4*07	IGHJ5*02	IGHD3-3*01	3	2	19
#3	92	HA-	IGKV3-15*01	IGKJ2*01		0	0	10
#3	93	HA-	IGHV3-66*01	IGHJ1*01	IGHD1-26*01	3	1	16
#3	93	HA-	IGKV1-27*01	IGKJ4*01		14	5	10
#3	96	HA-	IGHV1-18*01	IGHJ4*02	IGHD4-23*01	1	0	13
#3	96	HA-	IGKV1-39*01	IGKJ3*01		0	0	9
#4	5	H1+	IGHV4-34*01	IGHJ5*02	IGHD2-2*01	8	6	18
#4	5	H1+	IGKV3-20*01	IGKJ1*01		5	4	9
#4	6	H1+	IGHV3-74*01	IGHJ4*02	IGHD3-22*01	12	5	14
#4	6	H1+	IGKV1-39*01	IGKJ2*01		22	15	9
#4	14	H1+	IGHV3-11*01	IGHJ6*03	IGHD3-22*01	5	3	19
#4	14	H1+	IGKV2-30*01	IGKJ2*01		10	7	9
#4	20	H1+	IGHV4-34*01	IGHJ2*01	IGHD7-27*01	31	12	14
#4	20	H1+	IGKV1-39*01	IGKJ4*01		20	10	9
#4	26	H1+	IGHV3-23*01	IGHJ4*02	IGHD3-22*01	37	20	19
#4	26	H1+	IGKV1-17*01	IGKJ3*01		15	9	9
#4	27	H1+	IGHV3-23*01	IGHJ4*02	IGHD3-16*02	18	14	11
#4	27	H1+	IGKV3-15*01	IGKJ1*01		6	4	9
#4	28	H1+	IGHV3-23*01	IGHJ4*02	IGHD1-26*01	25	15	9
#4	28	H1+	IGKV1-17*01	IGKJ1*01		9	6	9
#4	30	H1+	IGHV3-53*01	IGHJ6*02	IGHD1-14*01	18	11	13
#4	30	H1+	IGKV2-28*01	IGKJ1*01		12	6	10
#4	34	H1+	IGHV4-34*01	IGHJ4*02	IGHD2-8*01	6	4	10
#4	34	H1+	IGKV1D-16*01	IGKJ1*01		5	5	9
#4	36	H1+	IGHV3-9*01	IGHJ6*02	IGHD2-2*02	8	7	22
#4	36	H1+	IGLV3-16*01	IGLJ3*02		17	15	10
#4	37	H1+	IGHV4-59*01	IGHJ5*02	IGHD3-22*01	13	9	24
#4	37	H1+	IGLV9-49*01	IGLJ3*02		7	3	13
#4	39	H1+	IGHV3-74*01	IGHJ4*02	IGHD3-10*01	3	2	16
#4	39	H1+	IGKV2-30*02	IGKJ1*01		2	2	9
#4	41	H1+	IGHV3-21*01	IGHJ2*01	IGHD6-6*01	14	8	15
#4	41	H1+	IGKV1-6*01	IGKJ1*01		9	5	9
#4	42	H1+	IGHV4-31*02	IGHJ6*02	IGHD6-13*01	21	15	23
#4	42	H1+	IGLV1-44*01	IGLJ2*01		20	7	11
#4	45	H1+	IGHV3-7*01	IGHJ4*02	IGHD6-19*01	20	11	10
#4	45	H1+	IGKV3-20*01	IGKJ4*01		15	10	9
#4	48	H1+	IGHV3-7*01	IGHJ1*01		13	7	5
#4	48	H1+	IGKV1-5*01	IGKJ2*01		5	3	6
#4	17	HA-	IGHV1-24*01	IGHJ5*02	IGHD6-19*01	14	11	14
#4	17	HA-	IGKV3-20*01	IGKJ4*01		16	12	9
#4	19	HA-	IGHV3-11*01	IGHJ4*02	IGHD3-16*01	14	12	15
#4	19	HA-	IGKV1-6*01	IGKJ3*01		4	3	9
#4	21	HA-	IGHV4-34*01	IGHJ4*02	IGHD2-2*01	17	10	12
#4	21	HA-	IGKV3-20*01	IGKJ4*01		11	8	8
#4	27	HA-	IGHV3-21*01	IGHJ4*02	IGHD3-3*01	6	4	12
#4	27	HA-	IGKV1-6*01	IGKJ1*01		2	2	9
#4	32	HA-	IGHV4-59*01	IGHJ3*02	IGHD1-14*01	28	15	11
#4	32	HA-	IGKV1-5*01	IGKJ2*01		13	6	9
#4	33	HA-	IGHV4-4*07	IGHJ5*02	IGHD6-25*01	11	7	14
#4	33	HA-	IGKV3-11*01	IGKJ3*01		3	3	9
#4	38	HA-	IGHV4-39*01	IGHJ4*02	IGHD4-23*01	11	8	13
#4	38	HA-	IGKV1-33*01	IGKJ3*01		7	2	9
#4	45	HA-	IGHV4-59*01	IGHJ4*03	IGHD2-21*02	25	16	9
#4	45	HA-	IGKV3-20*01	IGKJ2*02		10	6	9
#4	57	HA-	IGHV4-39*02	IGHJ5*02	IGHD6-19*01	6	3	13
#4	57	HA-	IGKV1-5*01	IGKJ1*01		15	8	9
#4	58	HA-	IGHV1-46*01	IGHJ6*02	IGHD2-21*02	28	17	21
#4	58	HA-	IGKV2-28*01	IGKJ3*01		4	2	8
#4	65	HA-	IGHV4-39*01	IGHJ6*02	IGHD3-3*01	21	13	14
#4	65	HA-	IGKV1-27*01	IGKJ4*01		11	5	9
#4	67	HA-	IGHV3-23*01	IGHJ4*02	IGHD2-15*01	21	11	17
#4	67	HA-	IGKV1-16*01	IGKJ4*01		10	6	9
#4	68	HA-	IGHV3-11*01	IGHJ4*02	IGHD5-18*01	15	10	14
#4	68	HA-	IGKV1-5*01	IGKJ2*01		5	4	9
#4	73	HA-	IGHV3-48*01	IGHJ6*02	IGHD1-1*01	6	6	17
#4	73	HA-	IGKV1-5*01	IGKJ4*01		3	2	9
#4	76	HA-	IGHV4-59*01	IGHJ5*02	IGHD3-22*01	15	9	16
#4	76	HA-	IGKV1-5*03	IGKJ1*01		6	4	9
#4	79	HA-	IGHV5-51*01	IGHJ3*02	IGHD2-15*01	7	4	15
#4	79	HA-	IGKV4-1*01	IGKJ2*02		5	1	9
